# Supplementary material
Source: PubMed Central journal article supplement (PMC4167417)
Supplement: NIHMS626531-supplement-supplement_1.pdf [file NIHMS626531-supplement-supplement_1.pdf]

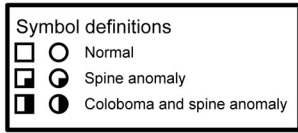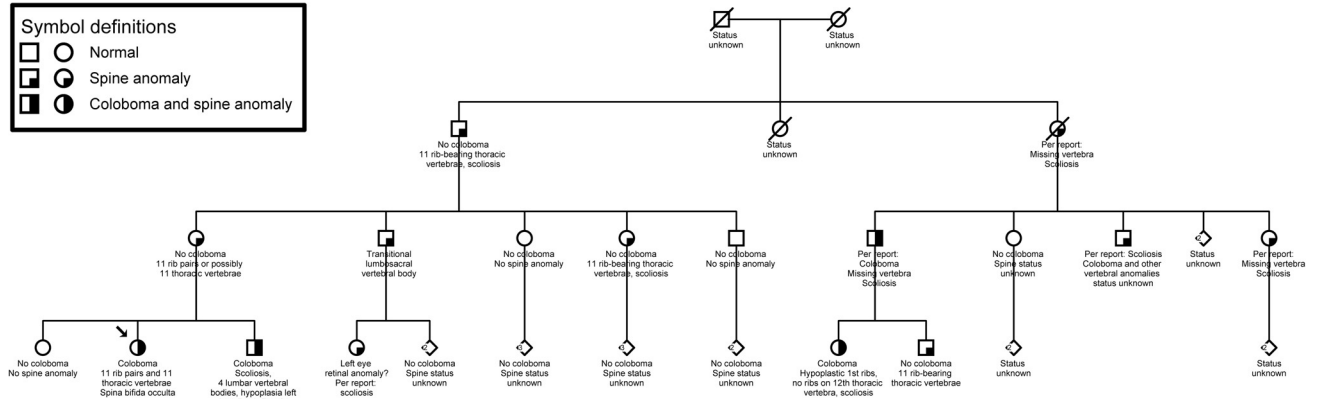

**SUPPLEMENTAL FIGURE 1. Uveal coloboma and vertebral anomalies in Family 1.** In this pedigree of Family 1, the proband (arrow) and her brother have coloboma and vertebral anomalies. The proband's second cousin and her mother's first cousin also have coloboma and vertebral anomalies. Eight other relatives have spine anomalies but no coloboma on anterior and posterior segment examination, suggesting the coloboma phenotype is incompletely penetrant.

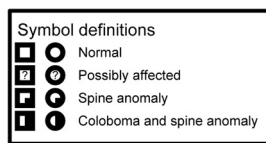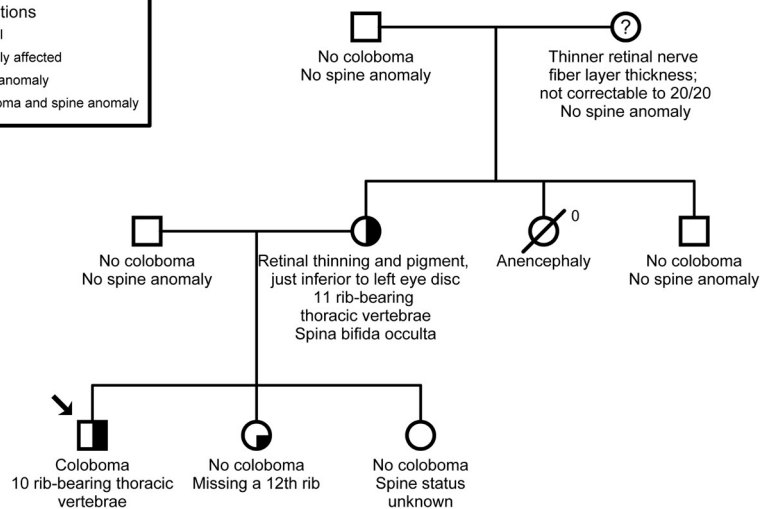

**SUPPLEMENTAL FIGURE 2. Uveal coloboma and vertebral anomalies in Family 2.** In Family 2 (unrelated to Family 1), the proband (arrow) and his mother have both coloboma and vertebral anomalies. The proband's sister has a unilateral absent 12th rib, but no coloboma on examination.

**SUPPLEMENTAL TABLE 1.** Uveal Coloboma Patients Excluded From Analysis (n = 25)

|                                      | No. of Participants |
|--------------------------------------|---------------------|
| 13q deletion, mosaic                 | 1                   |
| 2q37 deletion                        | 1                   |
| 47 XXX                               | 1                   |
| Branchio-oculo-facial (BOF) syndrome | 3                   |
| CHARGE syndrome                      | 5                   |
| Chorioretinal dystrophy              | 1                   |
| Anomaly of the optic nerve           | 1                   |
| Kabuki syndrome                      | 1                   |
| Macular coloboma                     | 2                   |
| Morning glory malformation           | 3                   |
| Optic nerve pit                      | 1                   |
| Papillo-renal syndrome               | 4                   |
| 45 X (Turner syndrome)               | 1                   |

**SUPPLEMENTAL TABLE 2.** Summary of Recent Population-Based Studies on Uveal Coloboma

| Study                                        | Design                                                                                                    | Study Participants                                                                              | Main Ocular Findings                                                                                                                                                                                                                                                           | Main Systemic Findings                                                                                                                                                                                        |
|----------------------------------------------|-----------------------------------------------------------------------------------------------------------|-------------------------------------------------------------------------------------------------|--------------------------------------------------------------------------------------------------------------------------------------------------------------------------------------------------------------------------------------------------------------------------------|---------------------------------------------------------------------------------------------------------------------------------------------------------------------------------------------------------------|
| Nakamura 2011 <sup>5</sup>                   | Retrospective review of pediatric patients in Olmsted County, Minnesota                                   | 33 pediatric patients (<19 years) with ocular coloboma, including patients with CHARGE syndrome | <u>Location of coloboma:</u><br>36% anterior segment<br>39% posterior segment<br>29% anterior & posterior segment<br><u>Concomitant ocular anomalies:</u><br>33% amblyopia<br>30% strabismus<br>15% microphthalmia/anophthalmia<br>55% with bilateral AMC<br>73% with coloboma | 36% developmental delay/mental retardation<br>21% cardiac anomalies<br>21% ear anomalies<br>18% skeletal anomalies<br>15% urogenital anomalies                                                                |
| Shah 2011 <sup>7</sup> and 2012 <sup>6</sup> | Prospective study of patients in the United Kingdom, recruited through an established surveillance system | 135 children with newly diagnosed AMC                                                           | <u>Location of coloboma:</u><br>14% anterior segment<br>43% posterior segment<br>43% anterior & posterior segment<br><u>Concomitant ocular anomalies (in addition to AMC):</u><br>25% cataract<br>16% nystagmus<br>6% optic nerve abnormalities<br>4% detached retina          | 60% with extraocular abnormalities<br>32% craniofacial<br>21% cardiovascular<br>15% gastrointestinal<br>14% CNS<br>12% hearing impaired<br>12% growth retardation<br>10% genitourinary<br>10% musculoskeletal |
| Current study                                | Retrospective review of patients seen at the National Eye Institute in Bethesda, Maryland                 | 99 patients (children and adults) with nonsyndromic coloboma                                    | <u>Location of coloboma:</u><br>8% anterior segment<br>23% posterior segment<br>69% anterior & posterior segment<br><u>Concomitant ocular anomalies:</u><br>29% microphthalmia<br>19% strabismus<br>16% cataract<br>15% microcornea<br>14% nystagmus<br>10% amblyopia          | 53% cardiac anomalies<br>17% CNS anomalies<br>16% developmental delay<br>15% audiologic abnormalities<br>13% skeletal anomalies<br>7% urogenital anomalies                                                    |

AMC = anophthalmia, microphthalmia, and typical coloboma; CNS = central nervous system.
